# Supplementary material for: Decoding the manganese-ion storage properties of Na1.25V3O8 nano-rods
Source: Royal Society of Chemistry journal article supplement (doi:10.1039/d4ta00480a), 2024-01-01
Supplement: d4ta00480a1.pdf [file d4ta00480a1.pdf]

## Supplementary information

### Decoding the Manganese-Ion Storage Properties of Na<sub>1.25</sub>V<sub>3</sub>O<sub>8</sub> Nanorods

Vaiyapuri Soundharrajan,<sup>a,f</sup> Subramanian Nithiananth,<sup>b,f</sup> Ghalib Alfaza,<sup>c</sup> JunJi Piao,<sup>c</sup> Duong Tung Pham,<sup>d</sup> Edison

Huixiang Ang,<sup>e</sup> Johannes Kasnatscheew,<sup>a,f</sup> Martin Winter<sup>a,f</sup>, Jung Ho Kim<sup>g,h\*</sup> and Jaekook Kim<sup>c,i\*</sup>

- a MEET Battery Research Center, Institute of Physical Chemistry, University of Münster, Münster, Corrensstraße 46, 48149 Germany.
- b Graduate School of Science and Technology, Shizuoka University, 3-5-1 Johoku, Naka-ku, Hamamatsu, Shizuoka, 432–8011, Japan.
- c Department of Materials Science and Engineering, Chonnam National University, 77 Yongbong-ro, Bukgu, Gwangju 61186, Republic of Korea
- d School of Engineering Physics, Hanoi University of Science and Technology, No 1 Dai Co Viet Street, 100000, Hanoi, Viet Nam.
- e Natural Sciences and Science Education, National Institute of Education, Nanyang Technological University, Singapore 637616, Singapore.
- f Helmholtz-Institute Münster (IEK-12), Forschungszentrum Jülich Münster, Corrensstraße 46, 48149 Germany.
- g Institute for Superconducting and Electronic Materials (ISEM), Faculty of Engineering and Information Sciences, University of Wollongong, North Wollongong, New South Wales, 2500, Australia.
- h School of Advanced Materials Science and Engineering, Sungkyunkwan University, Suwon, 16419, Republic of Korea.
- i Research Center for Artificial Intelligence Assisted Ionics Based Materials Development Platform, Chonnam National University, Gwangju, 61186, Republic of Korea; Fax: +82-62-530-1699; Tel: +82-62-530-1703

Corresponding Author

Jaekook Kim (E-mail: jaekook@chonnam.ac.kr)

**Table S1.** Rietveld refinement outputs of NVO.

| S.No | Elements | X       | Y       | Z       | SOF   | Sites |
|------|----------|---------|---------|---------|-------|-------|
| 1    | NA(1)    | 0.18400 | 0.75000 | 0.64100 | 1.250 | 1a    |
| 2    | NA(2)    | 0.81600 | 0.25000 | 0.31670 | 1.250 | 1a    |
| 3    | V(3)     | 0.11860 | 0.25000 | 0.91510 | 1.000 | 1a    |
| 4    | V(4)     | 0.31580 | 0.25000 | 0.45970 | 1.000 | 1a    |
| 5    | V(5)     | 0.25810 | 0.25000 | 0.19130 | 1.000 | 1a    |
| 6    | V(6)     | 0.74190 | 0.75000 | 0.80870 | 1.000 | 1a    |
| 7    | V(7)     | 0.68420 | 0.75000 | 0.54030 | 1.000 | 1a    |
| 8    | V(8)     | 0.88140 | 0.75000 | 0.07920 | 1.000 | 1a    |
| 9    | O(9)     | 0.04690 | 0.75000 | 0.92790 | 1.000 | 1a    |
| 10   | O(10)    | 0.22230 | 0.25000 | 0.81890 | 1.000 | 1a    |
| 11   | O(11)    | 0.19250 | 0.25000 | 0.55280 | 1.000 | 1a    |
| 12   | O(12)    | 0.14730 | 0.25000 | 0.32580 | 1.000 | 1a    |
| 13   | O(13)    | 0.17390 | 0.75000 | 0.17320 | 1.000 | 1a    |
| 14   | O(14)    | 0.52320 | 0.75000 | 0.72700 | 1.000 | 1a    |
| 15   | O(15)    | 0.39870 | 0.75000 | 0.46120 | 1.000 | 1a    |
| 16   | O(16)    | 0.69300 | 0.75000 | 0.95030 | 1.000 | 1a    |
| 17   | O(17)    | 0.30700 | 0.25000 | 0.04970 | 1.000 | 1a    |
| 18   | O(18)    | 0.60130 | 0.25000 | 0.53880 | 1.000 | 1a    |
| 19   | O(19)    | 0.47680 | 0.25000 | 0.27300 | 1.000 | 1a    |
| 20   | O(20)    | 0.82610 | 0.25000 | 0.82680 | 1.000 | 1a    |
| 21   | O(21)    | 0.85270 | 0.75000 | 0.67420 | 1.000 | 1a    |
| 22   | O(22)    | 0.80750 | 0.75000 | 0.44720 | 1.000 | 1a    |
| 23   | O(23)    | 0.77770 | 0.75000 | 0.18110 | 1.000 | 1a    |
| 24   | O(24)    | 0.95310 | 0.25000 | 0.07210 | 1.000 | 1a    |

|                                                                                                                                                                                                            |
|------------------------------------------------------------------------------------------------------------------------------------------------------------------------------------------------------------|
| $R_{wp}(\%)=4.36,$ $R_{exp}(\%)=3.37,$ $\chi^2=1.6738,$ $GOF=1.2938$                                                                                                                                       |
| $a=12.1180 \text{ \AA},$ $b=3.6061 \text{ \AA},$ $c=7.2421 \text{ \AA}$ Space group name P21/m<br>$\alpha=90^\circ,$ $\beta=106.88^\circ,$ $\gamma=90^\circ$ Unit-cell volume = $302.831736 \text{ \AA}^3$ |

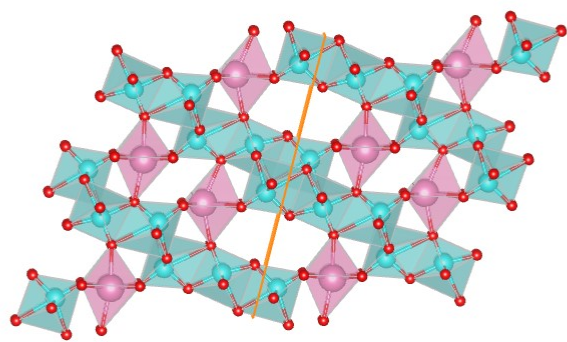

**(0 0 1)**

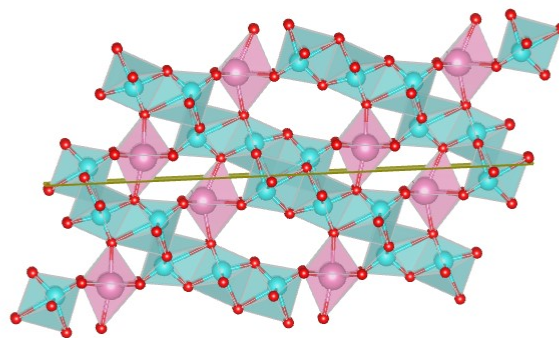

**(2 0 0)**

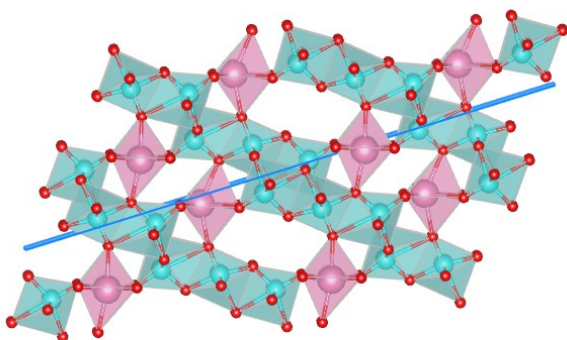

**(4 0 2)**

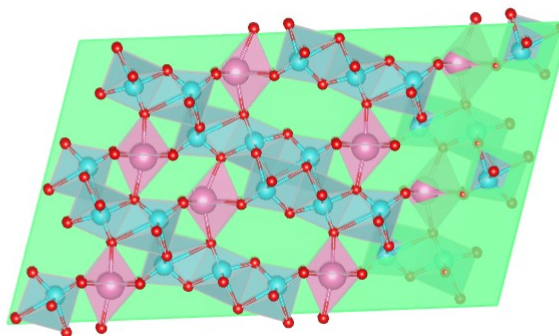

**(0 1 1)**

Fig. S1. Crystal structure from Rietveld refinement outputs of NVO.

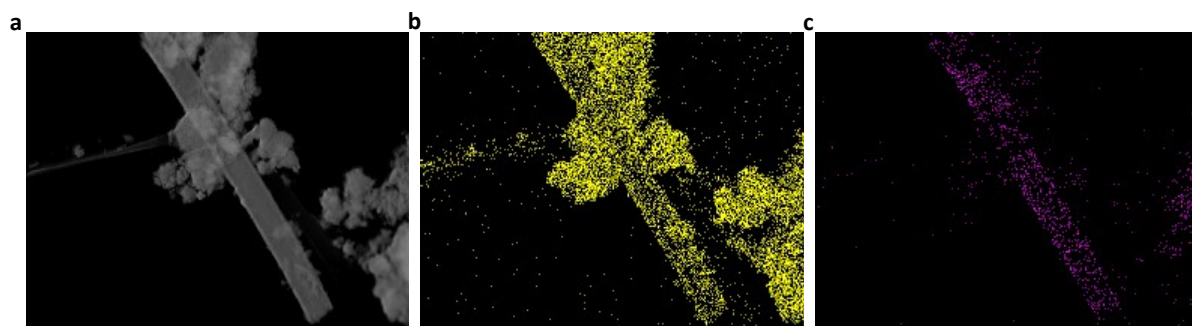

Fig. S2. The EDS-mapping Zn-Mn alloy micro-flakes.

**Table S2.** The R1, R2, R3, R4, and W4 for MS-NVO samples (before and after cycling).

| Sample Name          | R1 ( $\Omega$ ) | R2 ( $\Omega$ ) | R3 ( $\Omega$ ) | R4 ( $\Omega$ ) | W4<br>( $\Omega \cdot S^{-1/2}$ ) |
|----------------------|-----------------|-----------------|-----------------|-----------------|-----------------------------------|
| Before cycle fitting | 0.774           | 435.3           | 169             | 282.3           | 168                               |
| After cycle fitting  | 0.625           | 138             | 97              | 117             | 39.04                             |

**Table S3.** The R1, R2, R3, R4, and W4 for MC-NVO samples (before and after cycling).

| Sample Name          | R1 ( $\Omega$ ) | R2 ( $\Omega$ ) | R3 ( $\Omega$ ) | R4 ( $\Omega$ ) | W4<br>( $\Omega \cdot S^{-1/2}$ ) |
|----------------------|-----------------|-----------------|-----------------|-----------------|-----------------------------------|
| Before cycle fitting | 0.197           | 253             | 115.7           | 274.1           | 165.6                             |
| After cycle fitting  | 0.145           | 80.8            | 30.68           | 65.68           | 44.16                             |

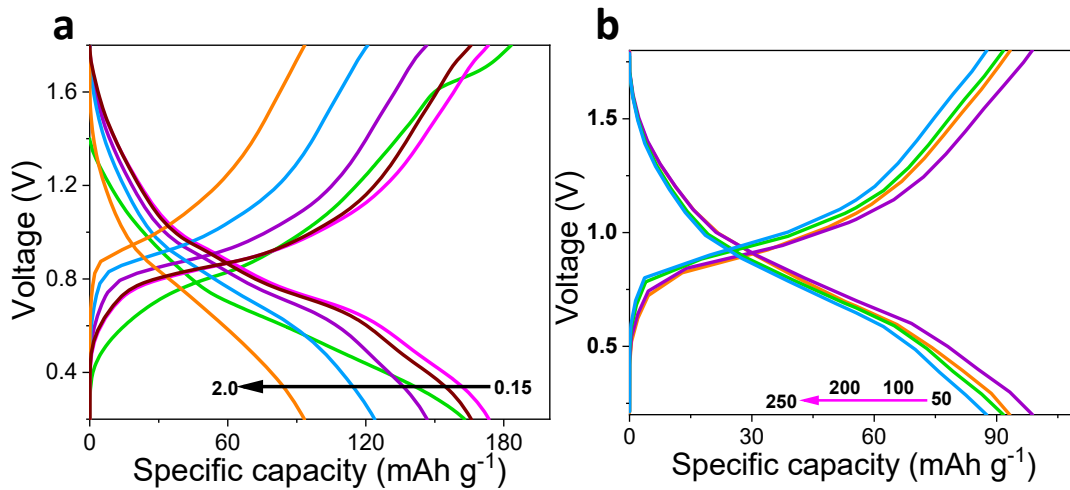

**Fig. S3.** Charge/discharge curves of the NVO||AC cell at (a) different rates and (b) 2.0 A g<sup>-1</sup>.
